# Supplementary material for: Structure Elucidation of Calyxoside B, a Bipolar Sphingolipid from a Marine Sponge Cladocroce sp. through the Use of Beckmann Rearrangement
Source: MDPI journal article supplement (doi:10.3390/md19060287), 2021-05-21
Supplement: s1 [file s1]

## *Supplementary Material*

# Structure elucidation of calyxoside B, a bipolar sphingolipid from a marine sponge *Cladocroce* sp. through the use of Beckmann rearrangement

Kenji Sugawara <sup>1</sup>, Hiroshi Watarai <sup>2</sup>, Yuji Ise <sup>3</sup>, Hisayoshi Yokose <sup>4</sup>, Yasuhiro Morii <sup>5</sup>, Nobuhiro Yamawaki <sup>6</sup>, ^Shigeru Okada <sup>7</sup>, Shigeki Matsunaga <sup>8,\*</sup>

<sup>1</sup> Laboratory of Aquatic Natural Products Chemistry, Graduate School of Agricultural and Life Sciences, The University of Tokyo, 1-1-1 Yayoi, Bunkyo-ku, Tokyo 113-8657, Japan

<sup>2</sup> Department of Immunology and Stem Cell Biology, Faculty of Medicine, Kanazawa University, Ishikawa 920-8640, Japan

<sup>3</sup> Sesoko Station, Tropical Biosphere Research Center, University of the Ryukyus, 3422 Sesoko, Motobu, Okinawa 905-0227, Japan

<sup>4</sup> Graduate School of Science and Technology, Kumamoto University, 2-39-1 Kurokami, Chuo-ku, Kumamoto 860-8555, Japan

<sup>5</sup> Graduate School of Fisheries Science and Environmental Studies, Nagasaki University, Nagasaki 852-8521, Japan

<sup>6</sup> Graduate School of Fisheries Science and Environmental Studies, Nagasaki University, Nagasaki 852-8521, Japan

<sup>7</sup> Laboratory of Aquatic Natural Products Chemistry, Graduate School of Agricultural and Life Sciences, The University of Tokyo, 1-1-1 Yayoi, Bunkyo-ku, Tokyo 113-8657, Japan

<sup>8</sup> Laboratory of Aquatic Natural Products Chemistry, Graduate School of Agricultural and Life Sciences, The University of Tokyo, 1-1-1 Yayoi, Bunkyo-ku, Tokyo 113-8657, Japan

## Table of contents

**Figure S1.** Photograph of a marine sponge *Cladocroce* sp.

**Figure S2.**  $^1\text{H}$  NMR spectrum (600 MHz) of calyxoside B (**1**) in  $\text{CD}_3\text{OD}$ ,

**Figure S3.** COSY spectrum (600 MHz) of calyxoside B (**1**) in  $\text{CD}_3\text{OD}$

**Figure S4.**  $^{13}\text{C}$  NMR spectrum (150 MHz) of calyxoside B (**1**) in  $\text{CD}_3\text{OD}$

**Figure S5.** HSQC spectrum (600 MHz) of calyxoside B (**1**) in  $\text{CD}_3\text{OD}$

**Figure S6.** HMBC spectrum (600 MHz) of calyxoside B (**1**) in  $\text{CD}_3\text{OD}$

**Figure S7.**  $^1\text{H}$  NMR spectrum (600 MHz) of calyxoside (**2**) in  $\text{CD}_3\text{OD}$

**Figure S8.** COSY spectrum (600 MHz) of calyxoside (**2**) in  $\text{CD}_3\text{OD}$

**Figure S9.**  $^{13}\text{C}$  NMR spectrum (150 MHz) of calyxoside (**2**) in  $\text{CD}_3\text{OD}$

**Figure S10.** HSQC spectrum (600 MHz) of calyxoside (**2**) in  $\text{CD}_3\text{OD}$

**Figure S11.** HMBC spectrum (600 MHz) of calyxoside (**2**) in  $\text{CD}_3\text{OD}$

**Figure S12.**  $^1\text{H}$  NMR spectrum (600 MHz) of the aglycone (**5**) in  $\text{CD}_3\text{OD}$

**Figure S13.** COSY spectrum (600 MHz) of the aglycone (**5**) in  $\text{CD}_3\text{OD}$

**Figure S14.** LC–MS chromatograms of derivatives of amide methanolysis products

**Figure S15.**  $^1\text{H}$  NMR spectrum (600 MHz) of the (S)-MTPA ester (**13**) in  $\text{CD}_3\text{OD}$

**Figure S16.** COSY spectrum (600 MHz) of the (S)-MTPA ester (**13**) in  $\text{CD}_3\text{OD}$

**Figure S17.** HSQC spectrum (600 MHz) of the (S)-MTPA ester (**13**) in  $\text{CD}_3\text{OD}$

**Figure S18.**  $^1\text{H}$  NMR spectrum (600 MHz) of the (R)-MTPA ester (**14**) in  $\text{CD}_3\text{OD}$

**Figure S19.** COSY spectrum (600 MHz) of the (R)-MTPA ester (**14**) in  $\text{CD}_3\text{OD}$

**Figure S20.** HSQC spectrum (600 MHz) of the (R)-MTPA ester (**14**) in  $\text{CD}_3\text{OD}$

**Figure S21.**  $^1\text{H}$  NMR spectrum (600 MHz) of the bis-oxazolidinone (**15**) in  $\text{CD}_3\text{OD}$

**Figure S22.** COSY spectrum (600 MHz) of the bis-oxazolidinone (**15**) in  $\text{CD}_3\text{OD}$

**Figure S23.** NOESY spectrum (600 MHz) of the bis-oxazolidinone (**15**) in  $\text{CD}_3\text{OD}$

**Figure S24.** LC–MS chromatograms of sugar derivatives

**Figure S25.** Graphs of MTT assay of **1**, **2**, **5** and the mixture of **6** and **7** against HeLa cells

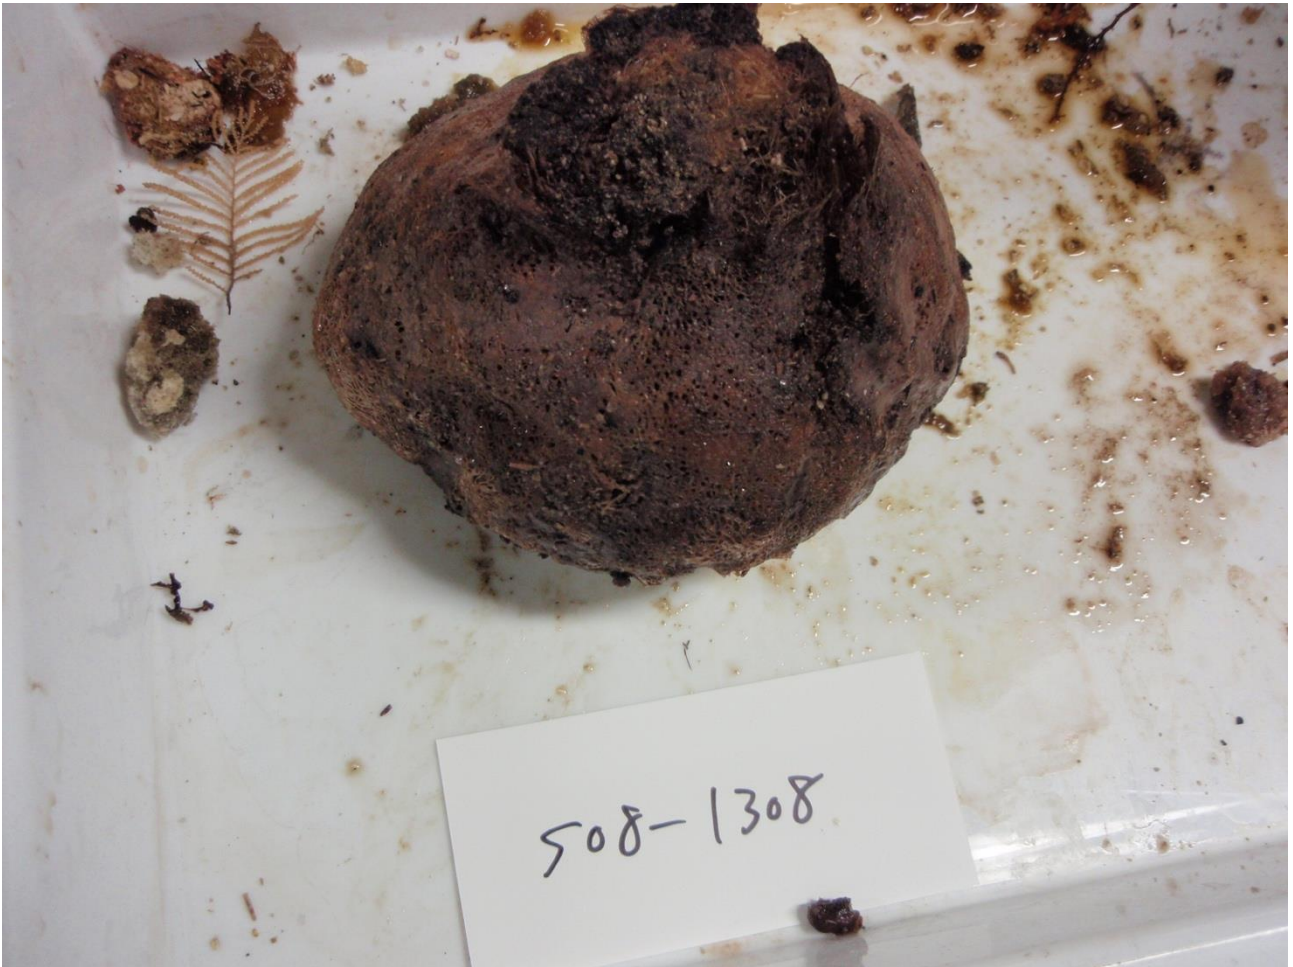

**Figure S1.** Photograph of a marine sponge *Cladocroce* sp.

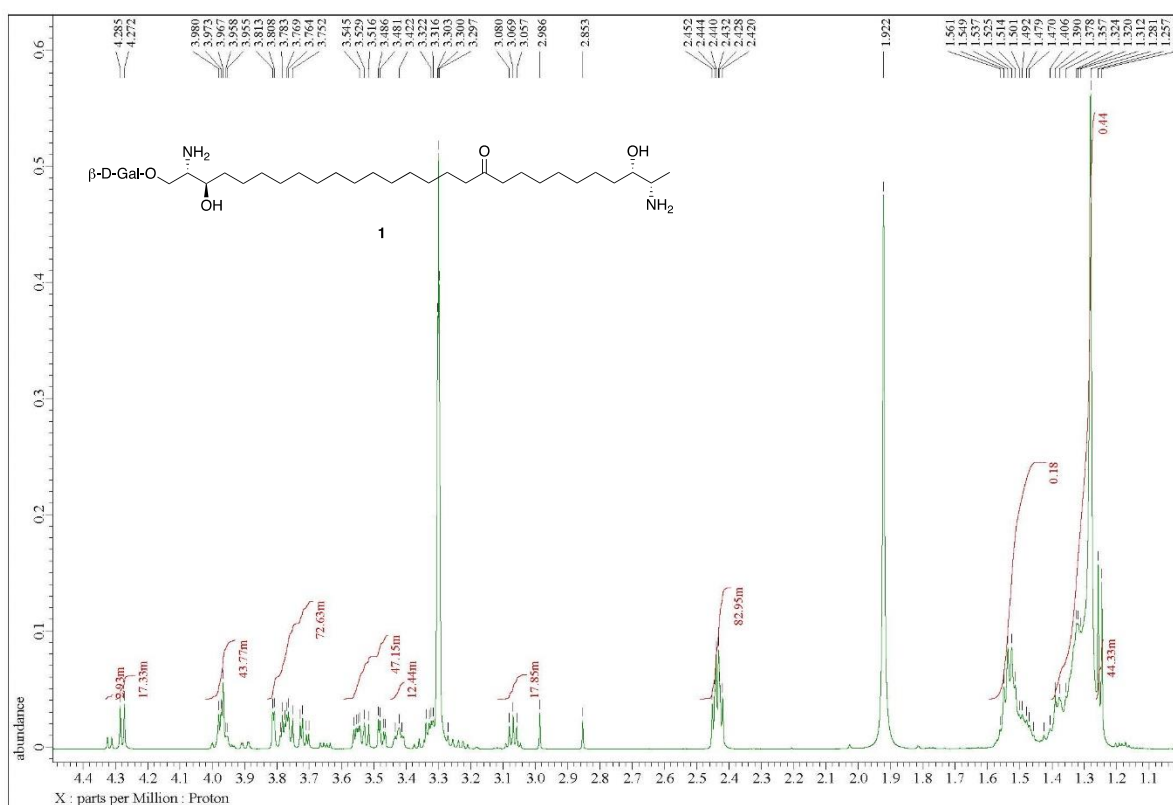

**Figure S2.** <sup>1</sup>H NMR spectrum (600 MHz) of calyxoside B (1) in CD<sub>3</sub>OD

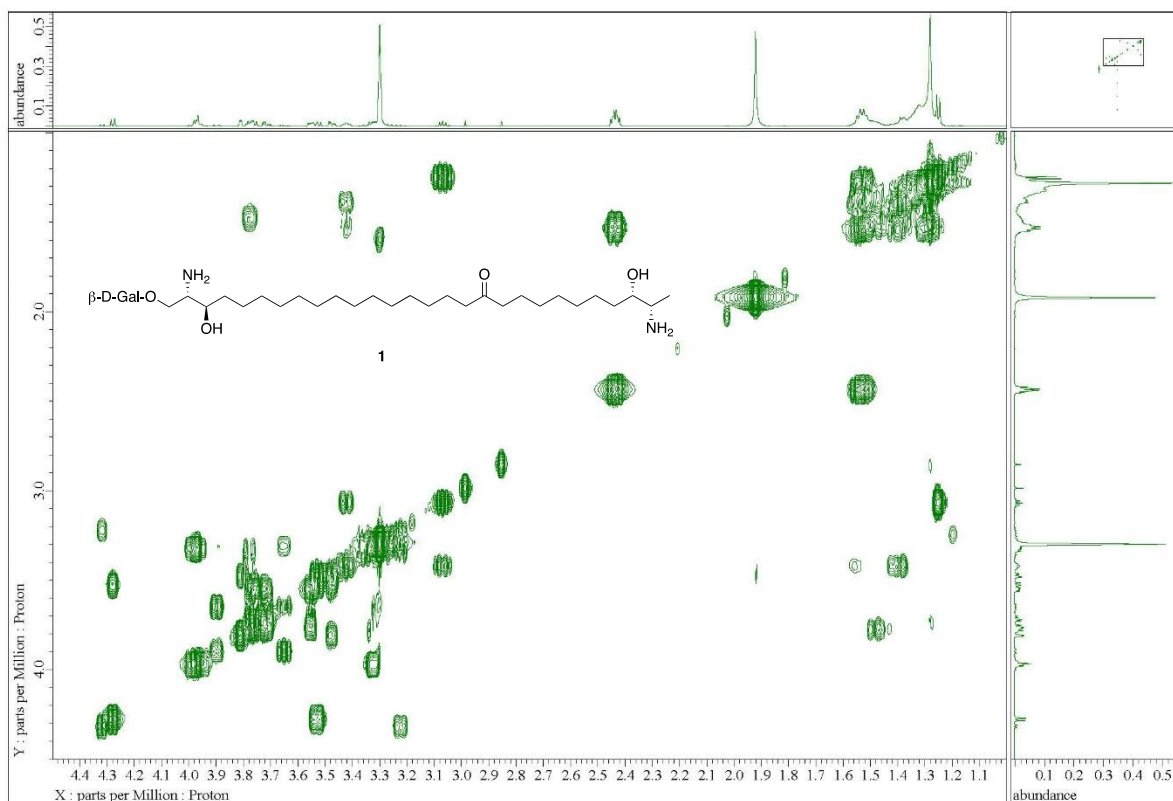

**Figure S3.** COSY spectrum (600 MHz) of calyxoside B (1) in CD<sub>3</sub>OD

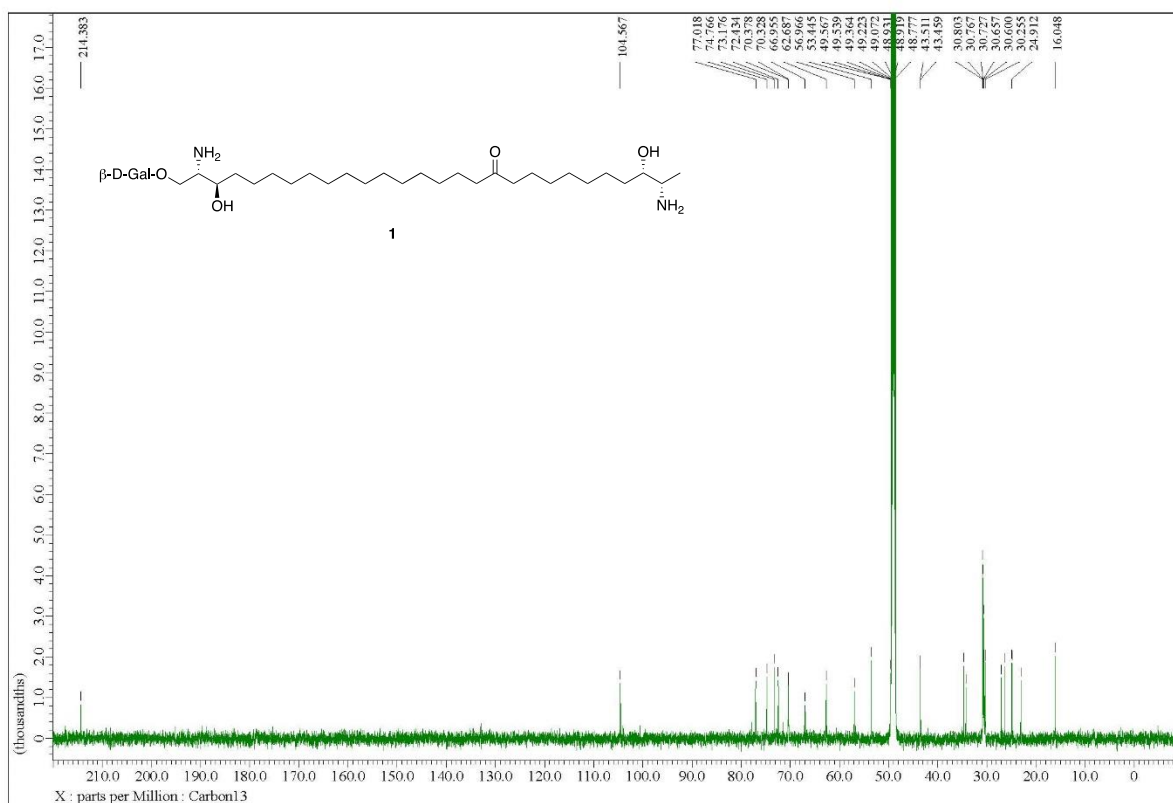

**Figure S4.** <sup>13</sup>C NMR spectrum (150 MHz) of calyxoside B (1) in CD<sub>3</sub>OD

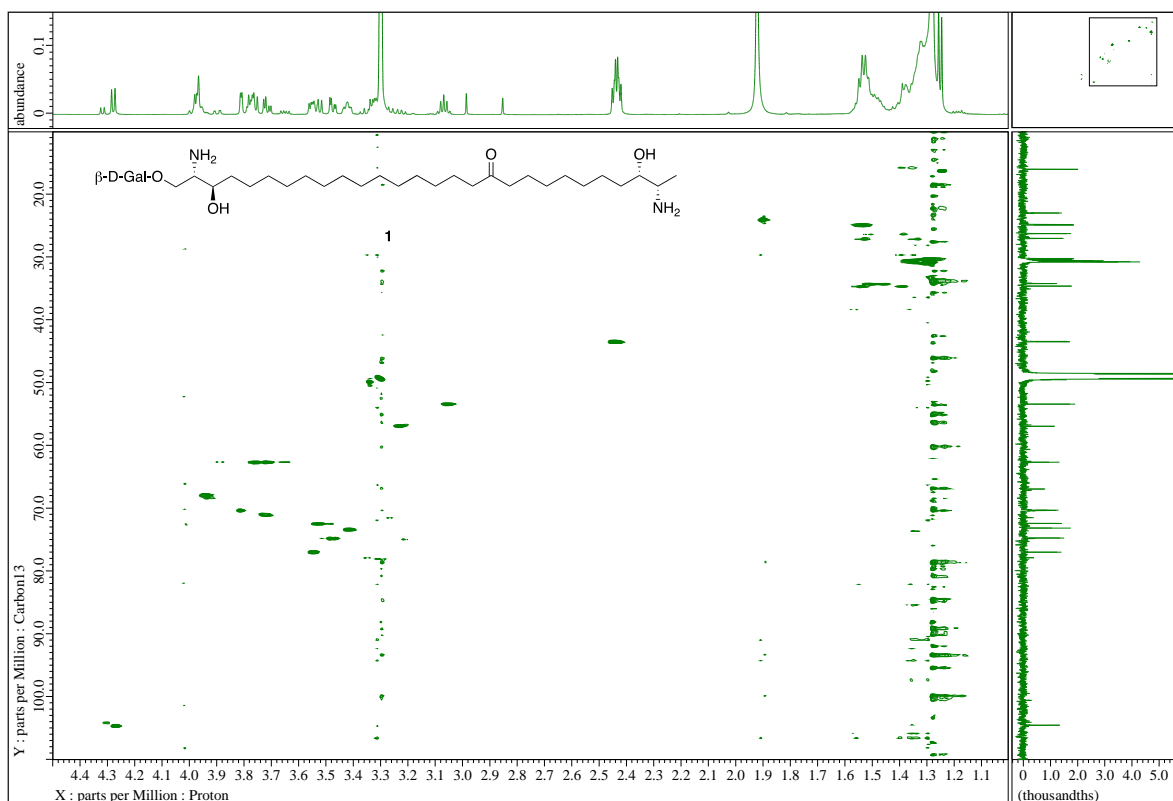

**Figure S5.** HSQC spectrum (600 MHz) of calyxoside B (1) in CD<sub>3</sub>OD

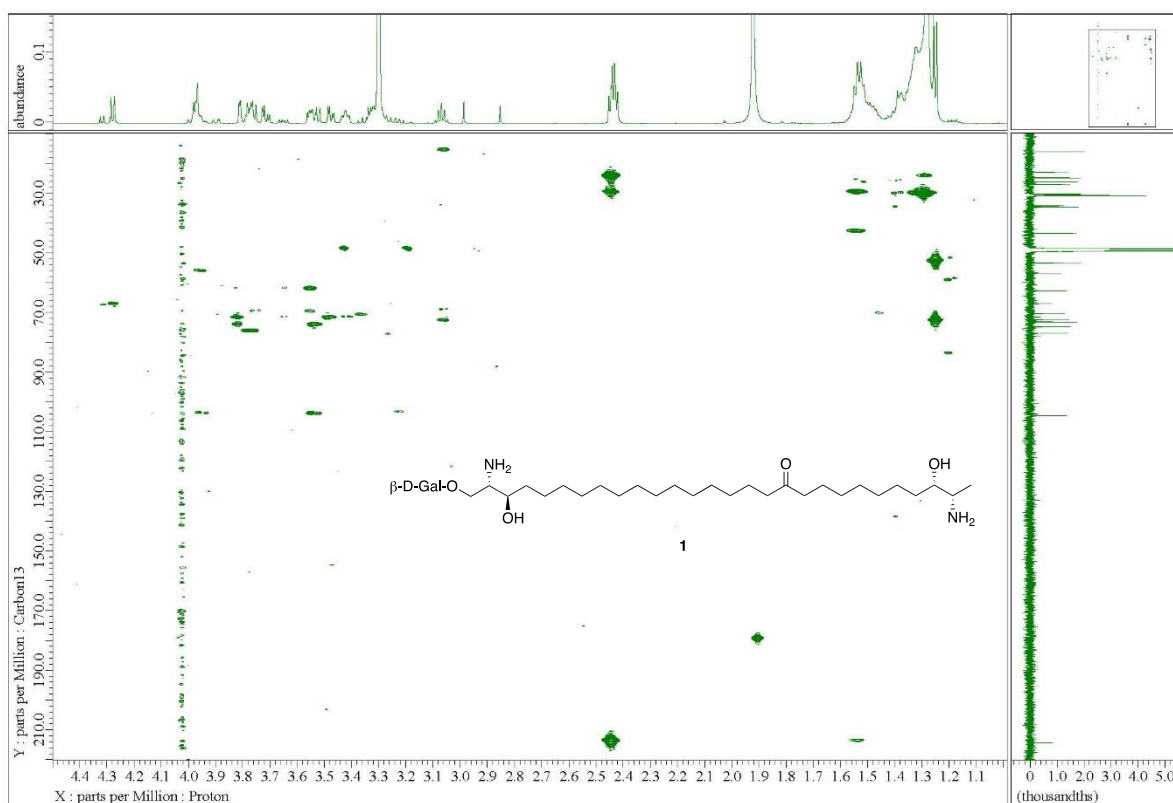

**Figure S6.** HMBC spectrum (600 MHz) of calyxoside B (**1**) in CD<sub>3</sub>OD

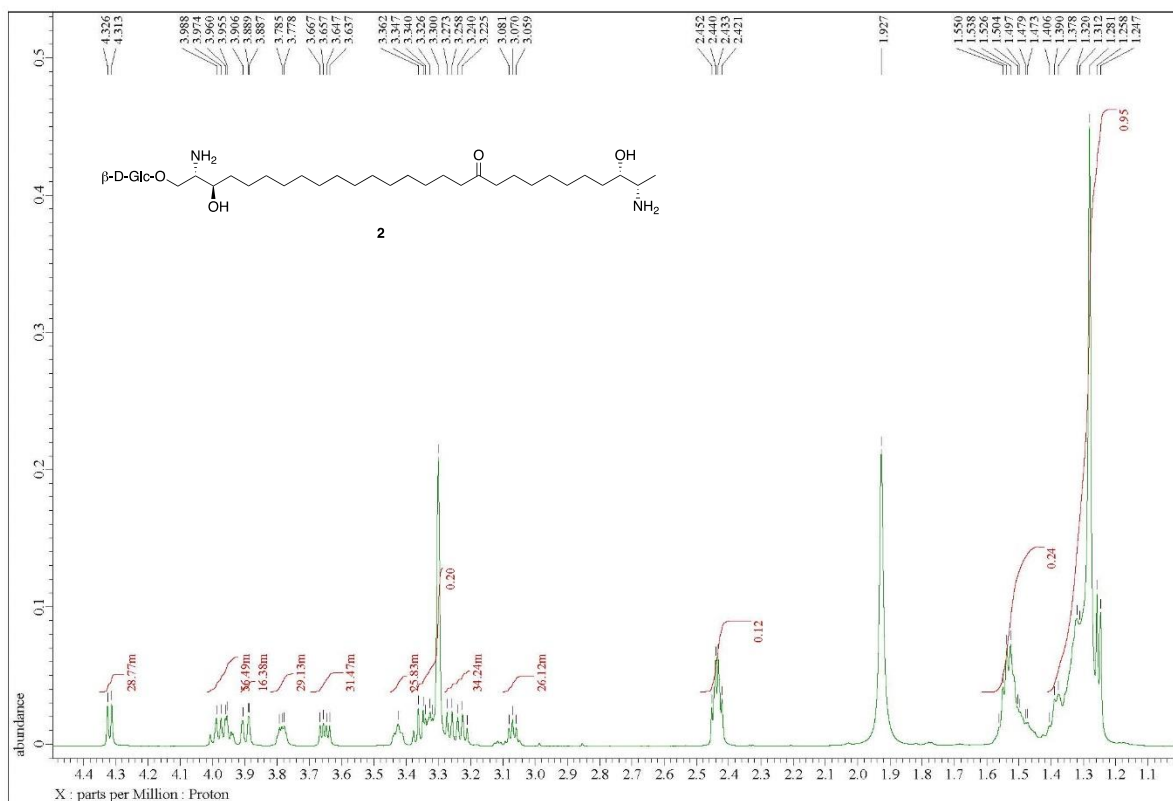

**Figure S7.** <sup>1</sup>H NMR spectrum (600 MHz) of calyxoside (**2**) in CD<sub>3</sub>OD

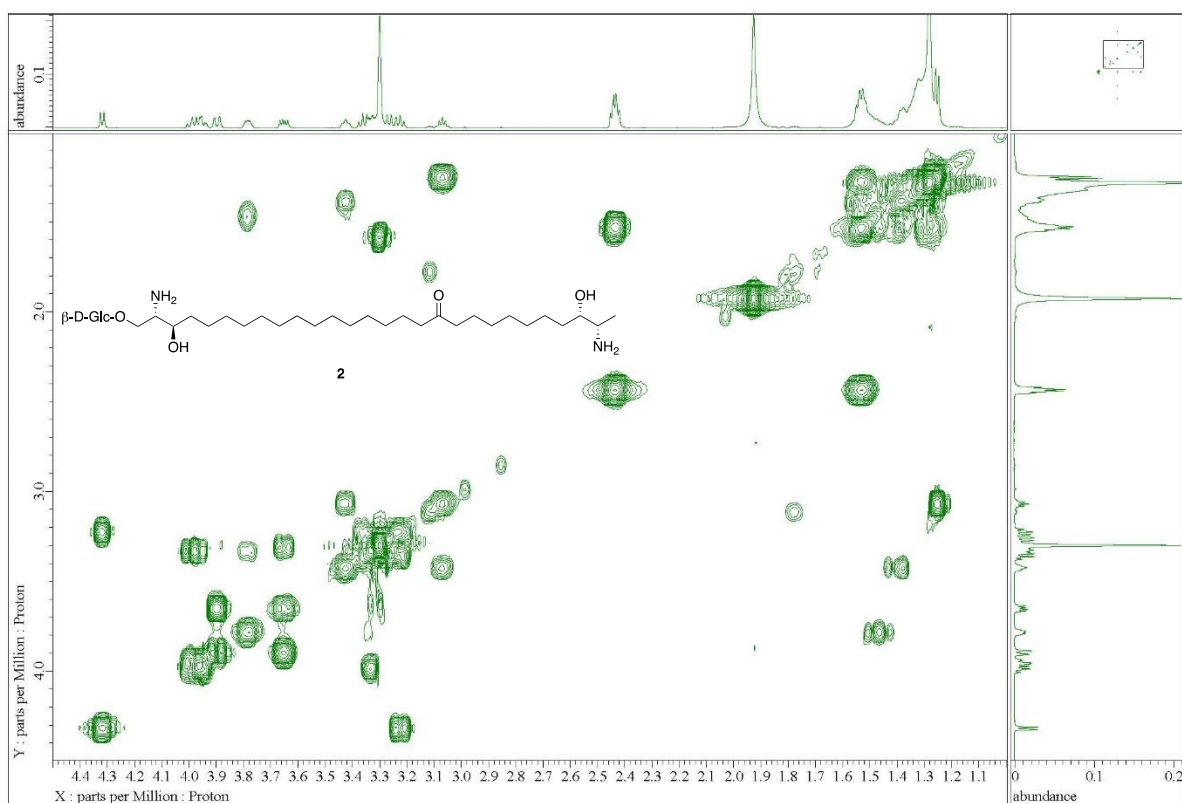

**Figure S8.** COSY spectrum (600 MHz) of calyxoside (**2**) in CD<sub>3</sub>OD

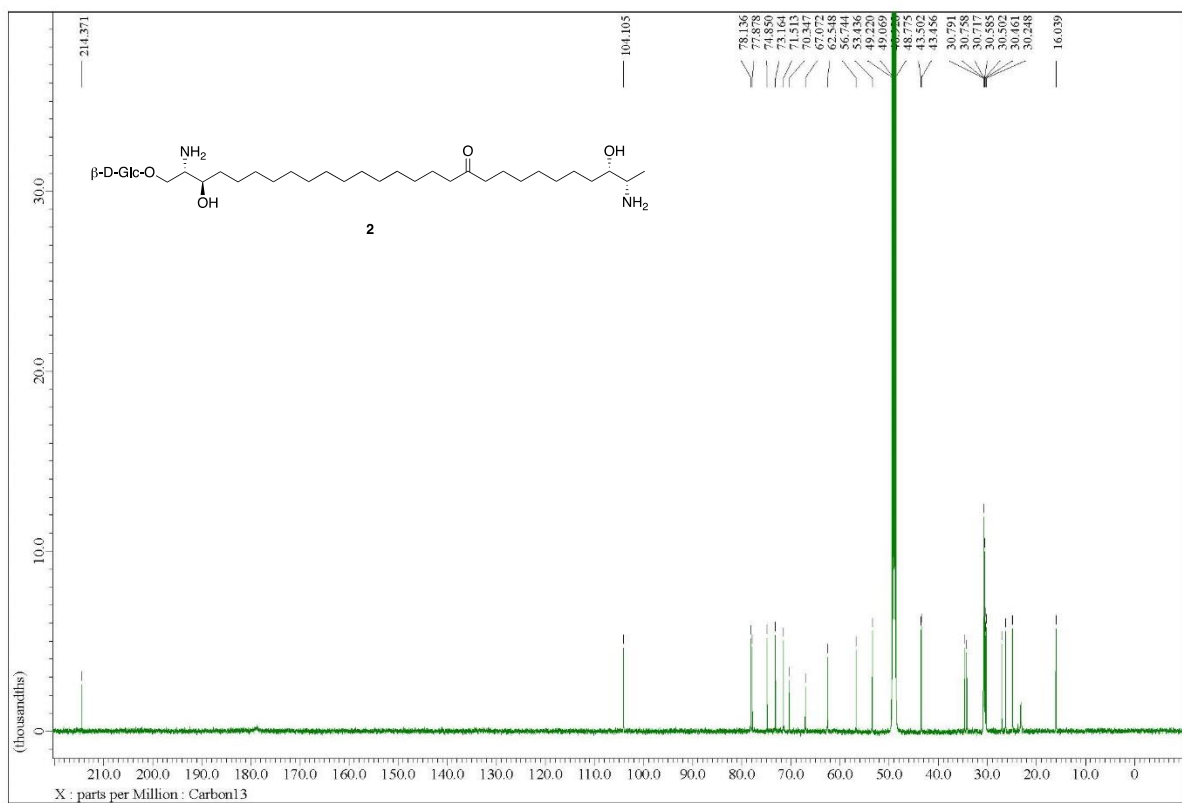

**Figure S9.** <sup>13</sup>C NMR spectrum (150 MHz) of calyxoside (**2**) in CD<sub>3</sub>OD



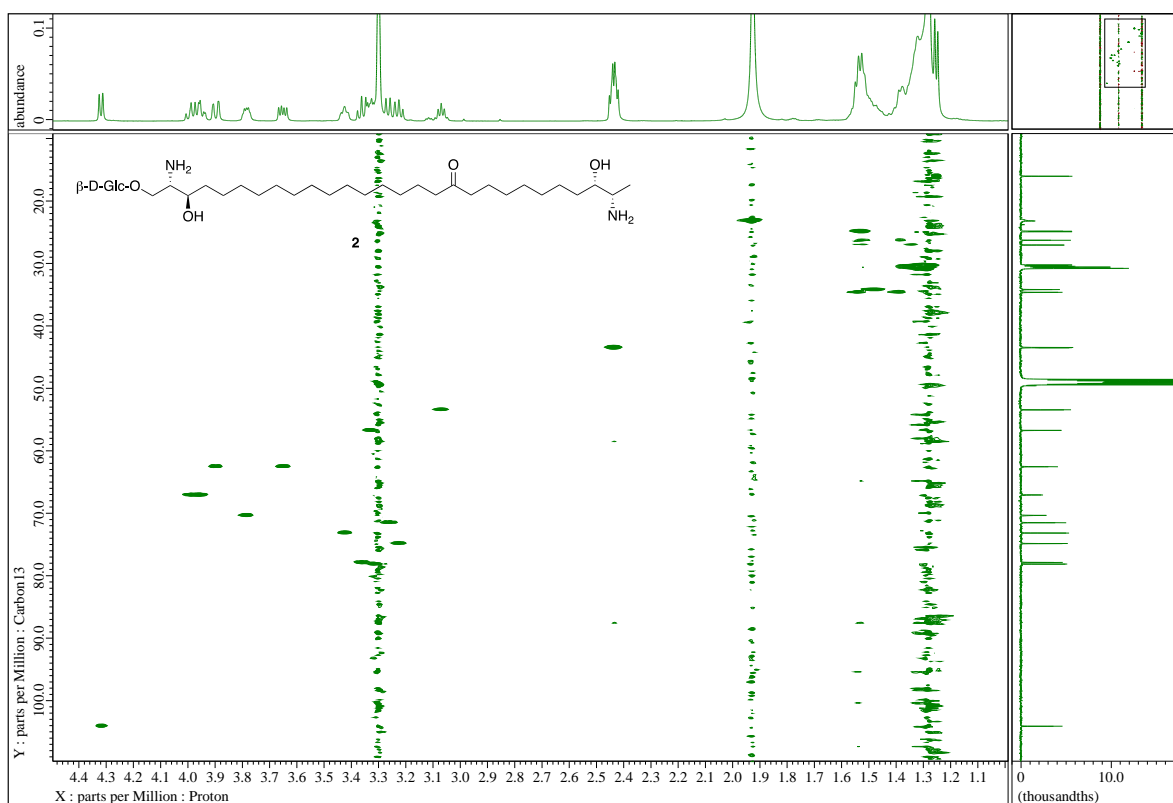

**Figure S10.** HSQC spectrum (600 MHz) of calyxoside (**2**) in CD<sub>3</sub>OD

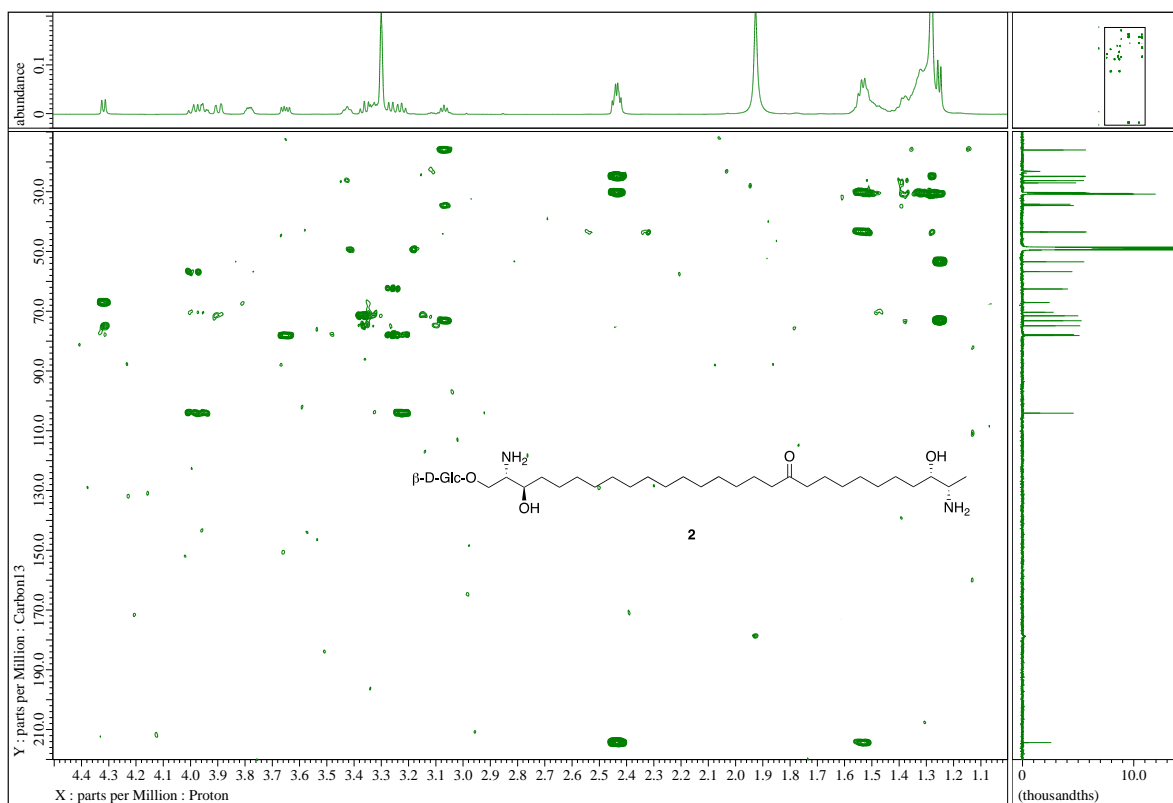

**Figure S11.** HMBC spectrum (600 MHz) of calyxoside (**2**) in CD<sub>3</sub>OD



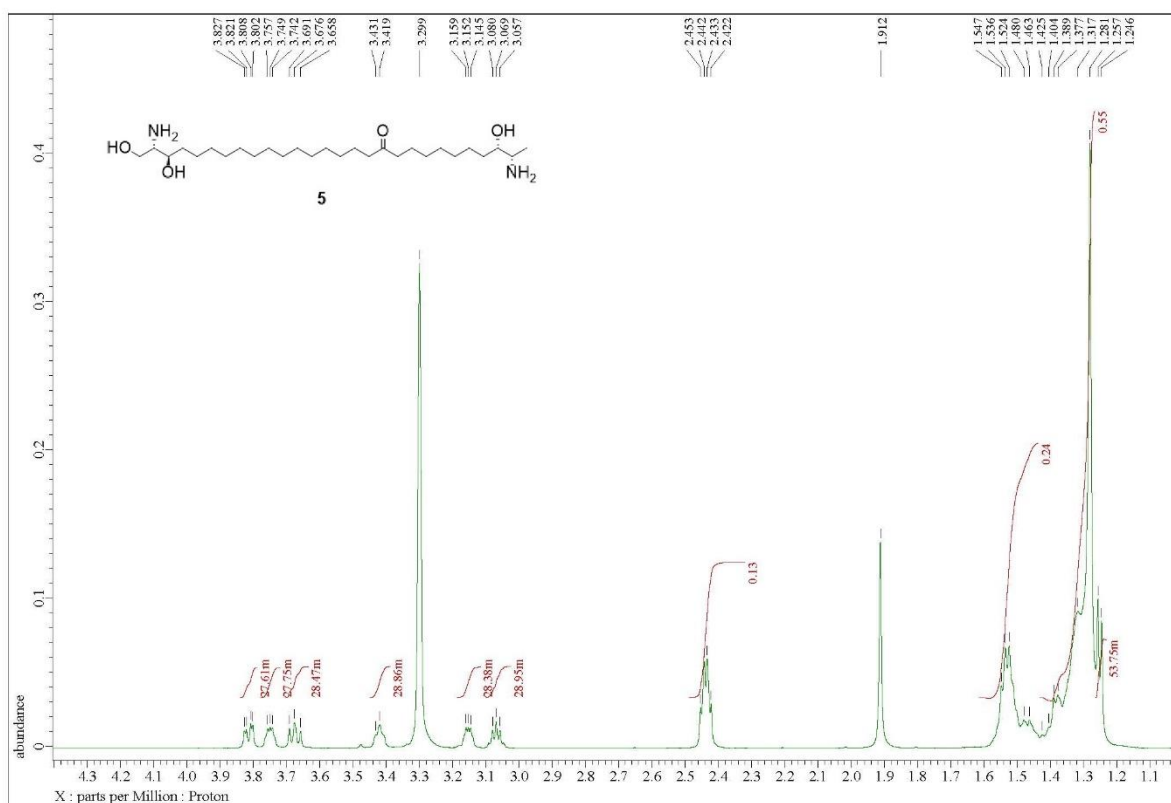

**Figure S12.**  $^1\text{H}$  NMR spectrum (600 MHz) of the aglycone (5) in  $\text{CD}_3\text{OD}$

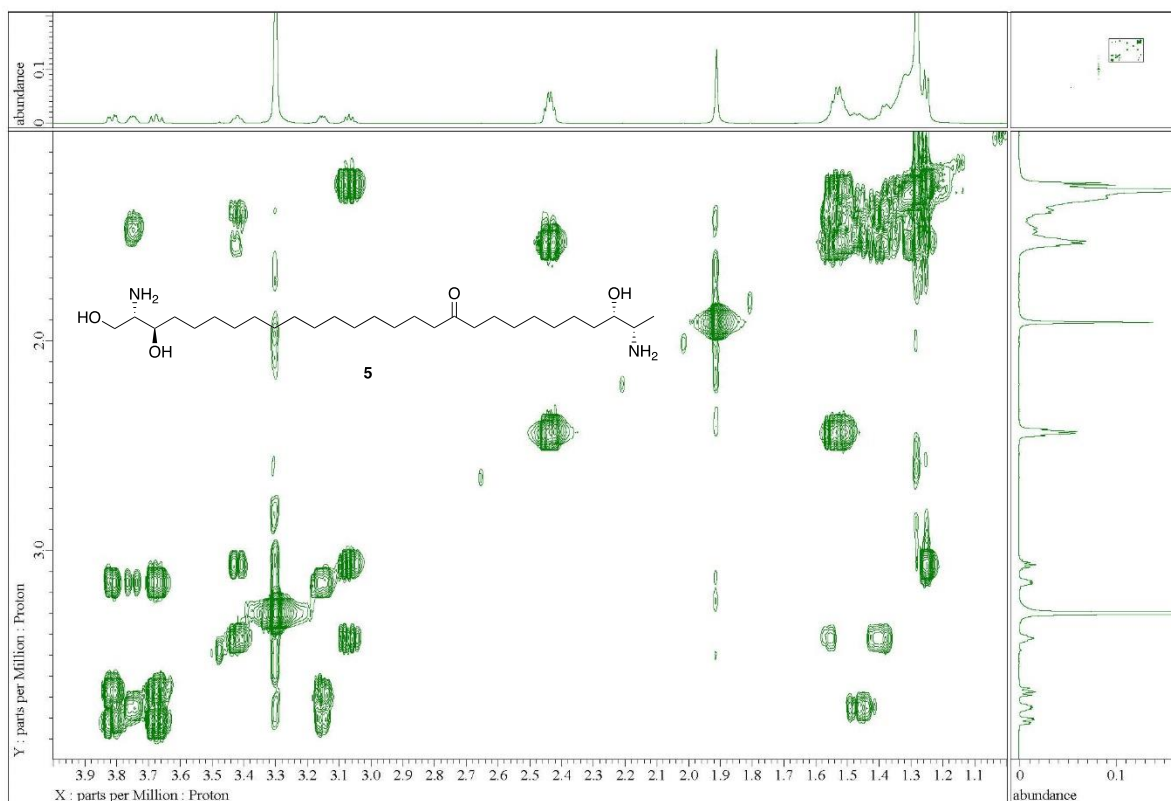

**Figure S13.** COSY spectrum (600 MHz) of the aglycone (5) in  $\text{CD}_3\text{OD}$

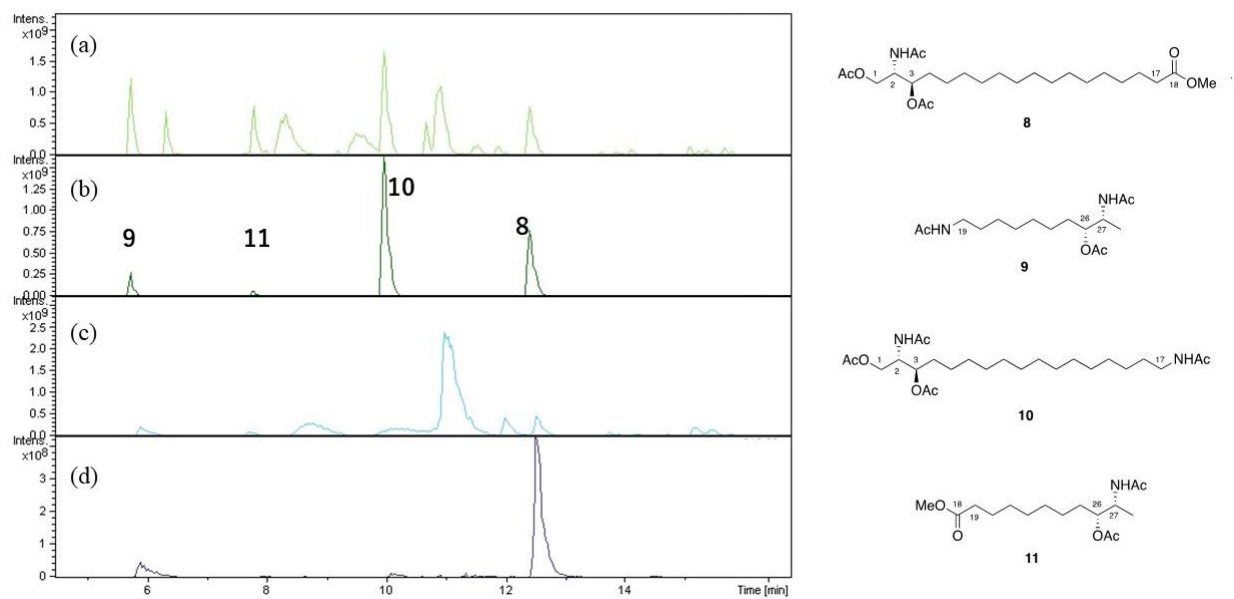

**Figure S14.** LC-MS chromatograms of derivatives of amide methanolysis products  
a: All ions from **6** and **7**, b: Ions at  $m/z$  472.3 (**8**), 315.2 (**9**), 471.3 (**10**) and 316.2 (**11**) from **6** and **7**,  
c: All ions from **6**, d: Ions at  $m/z$  472.3, 315.2, 471.3 and 316.2 from **6**

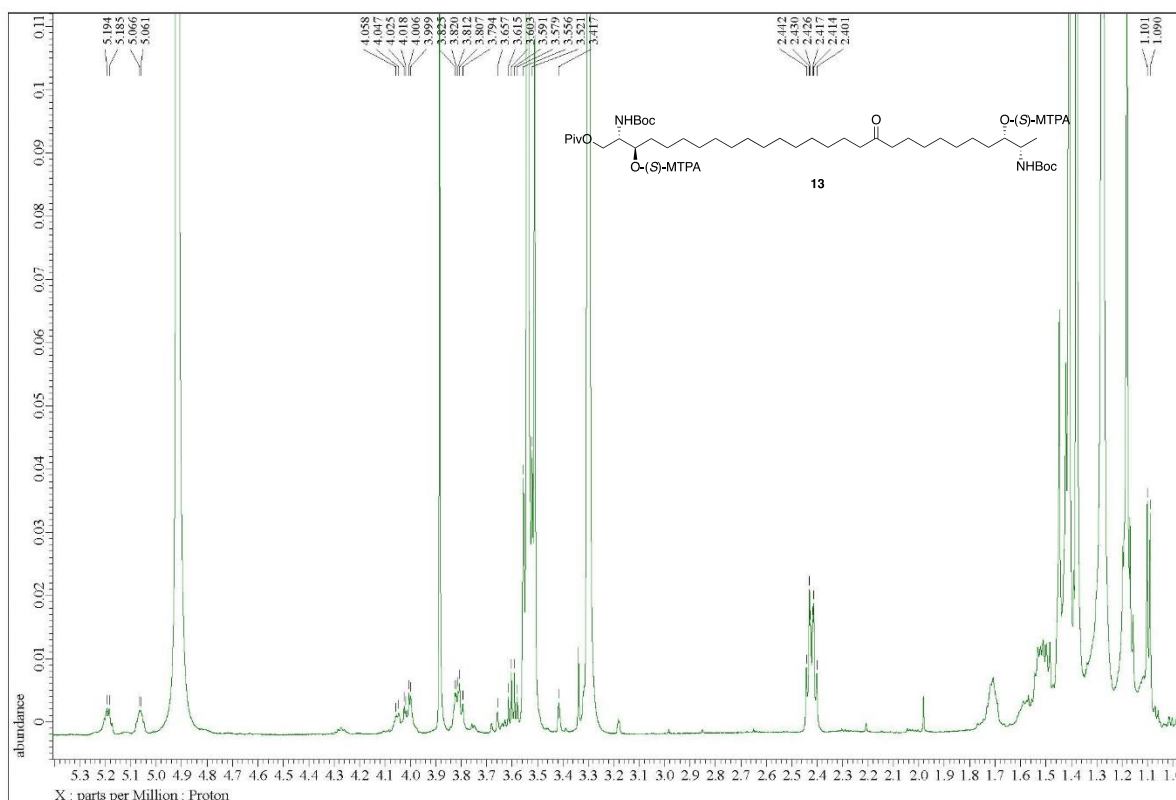

**Figure S15.**  $^1\text{H}$  NMR spectrum (600 MHz) of the (*S*)-MTPA ester (**13**) in  $\text{CD}_3\text{OD}$

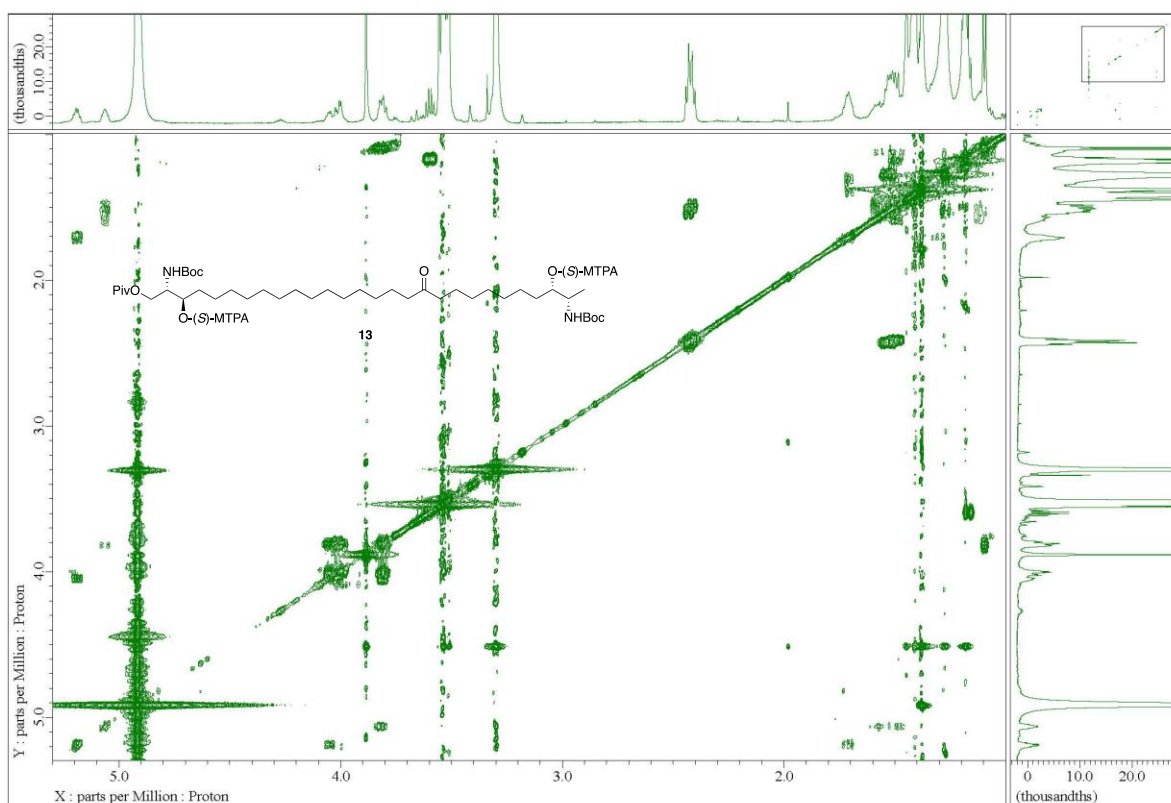

**Figure S16.** COSY spectrum (600 MHz) of the (*S*)-MTPA ester (**13**) in CD<sub>3</sub>OD

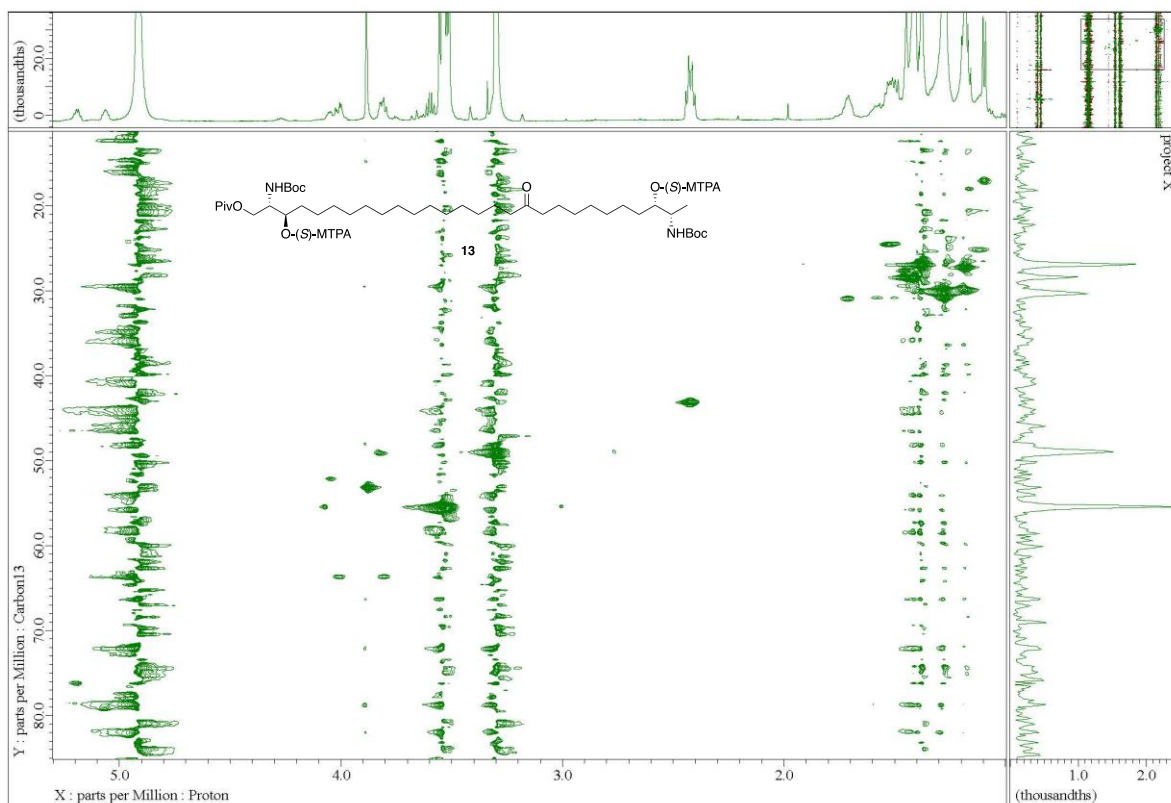

**Figure S17.** HSQC spectrum (600 MHz) of the (*S*)-MTPA ester (**13**) in CD<sub>3</sub>OD

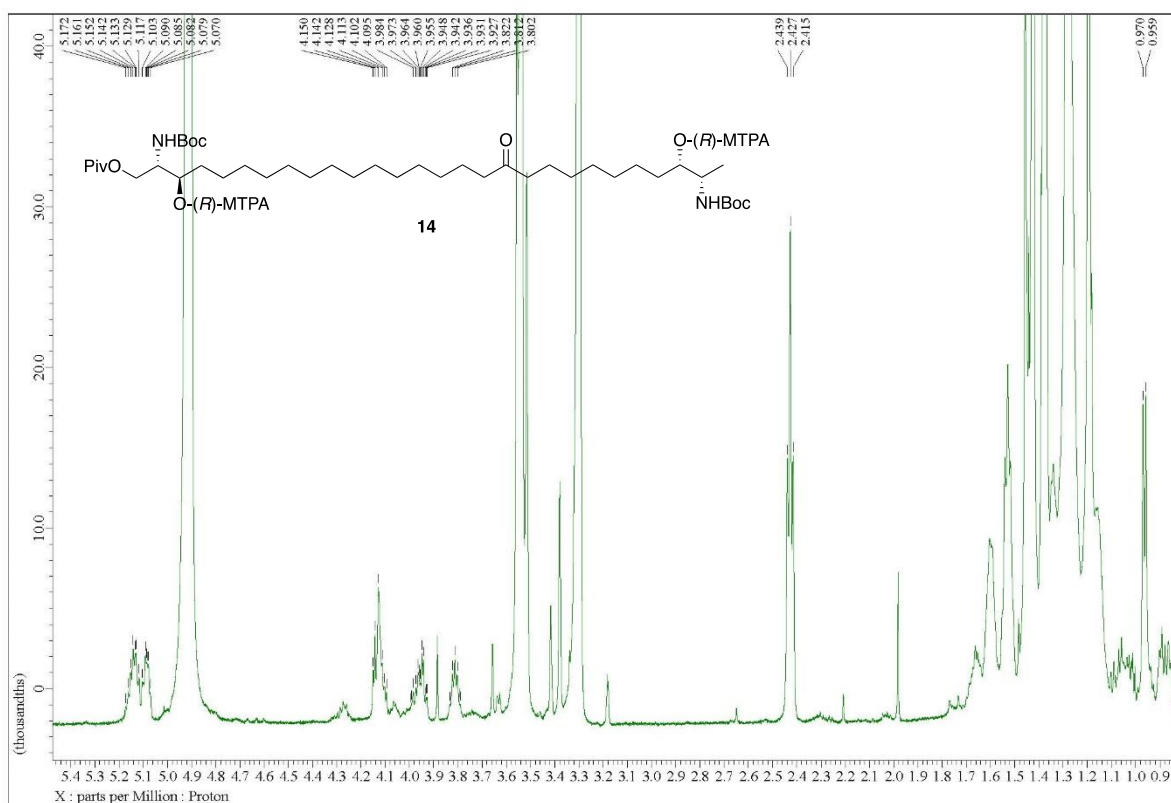

**Figure S18.**  $^1\text{H}$  NMR spectrum (600 MHz) of the (*R*)-MTPA ester (**14**) in  $\text{CD}_3\text{OD}$

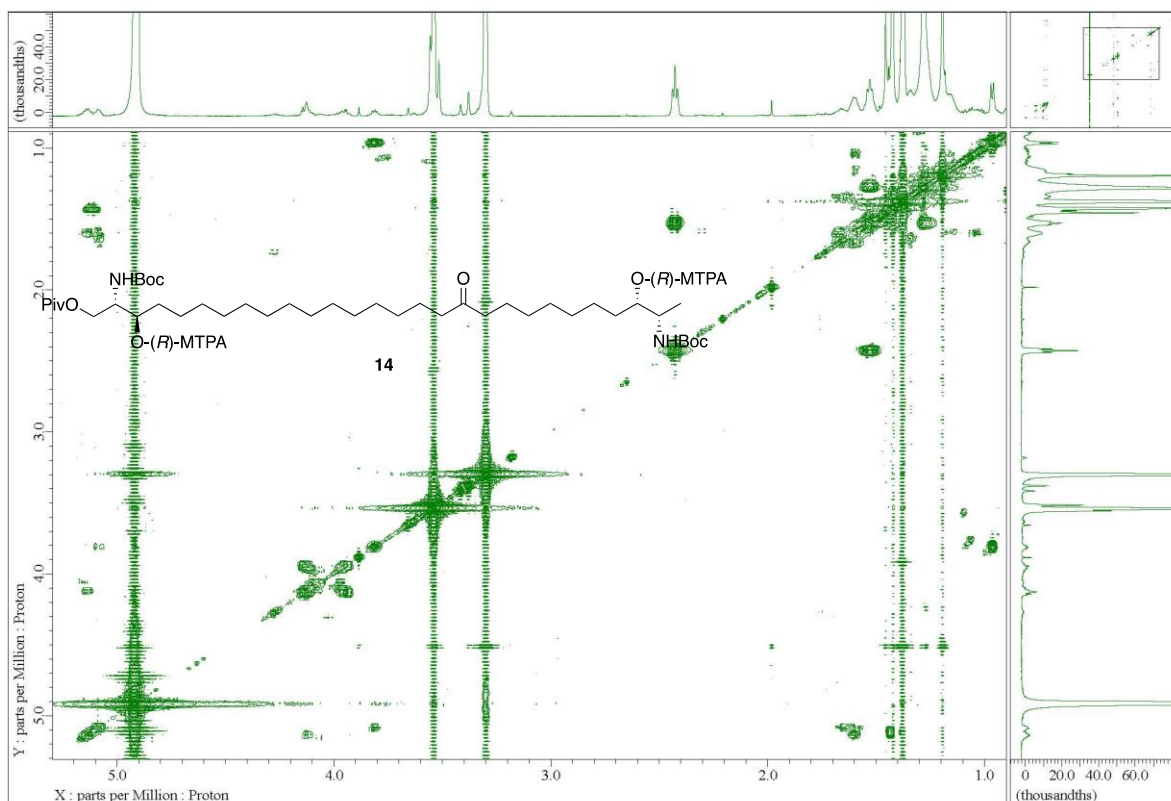

**Figure S19.** COSY spectrum (600 MHz) of the (*R*)-MTPA ester (**14**) in  $\text{CD}_3\text{OD}$

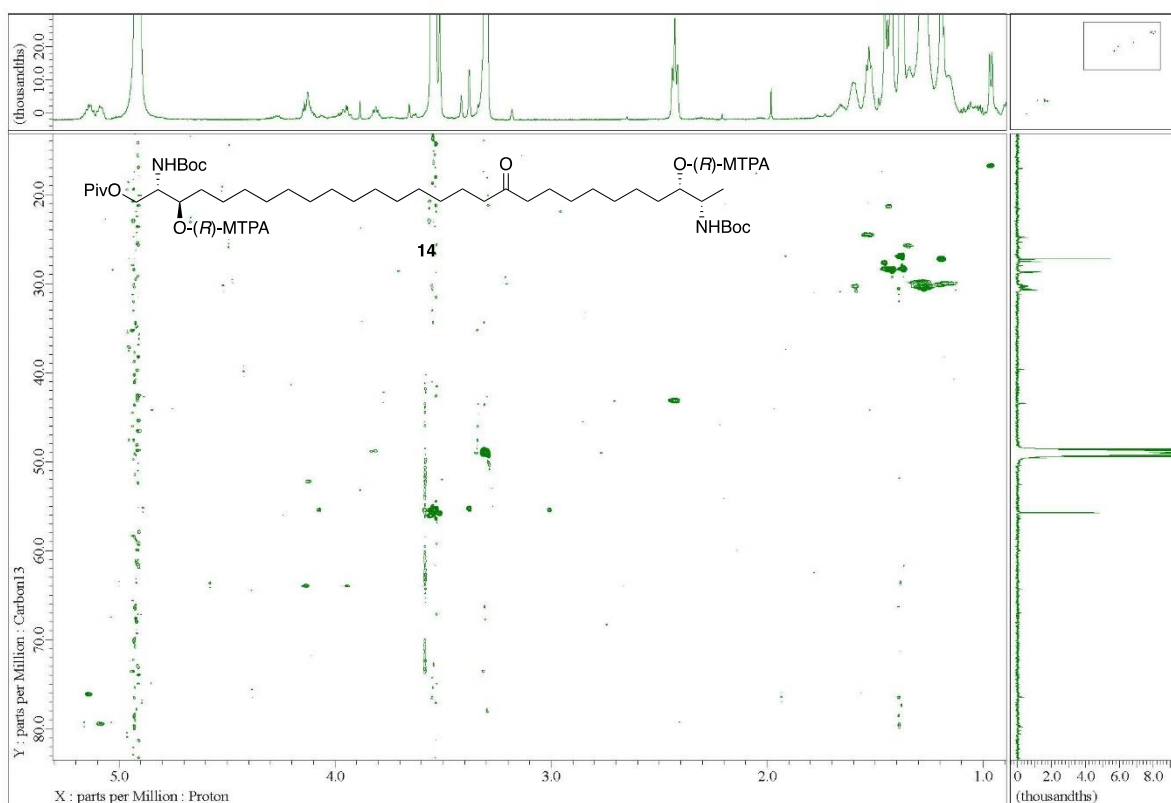

**Figure S20.** HSQC spectrum (600 MHz) of the (*R*)-MTPA ester (**14**) in CD<sub>3</sub>OD

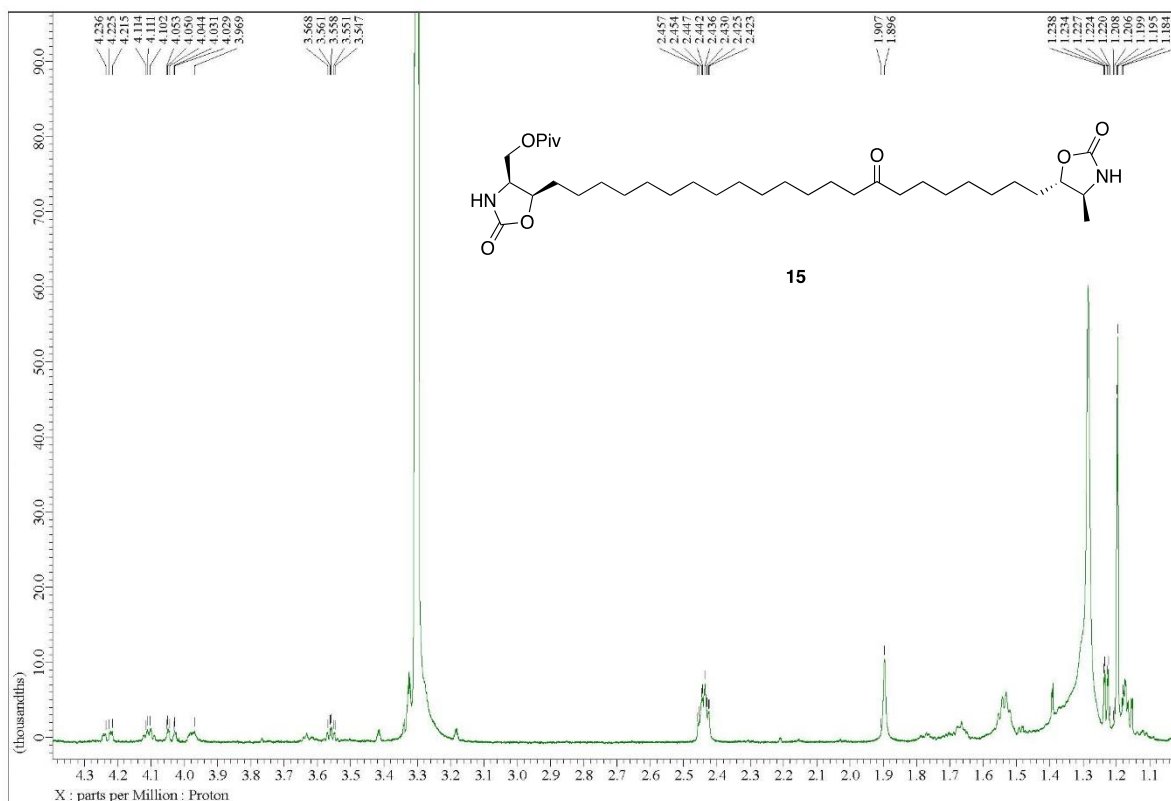

**Figure S21.** <sup>1</sup>H NMR spectrum (600 MHz) of the bis-oxazolidinone (**15**) in CD<sub>3</sub>OD



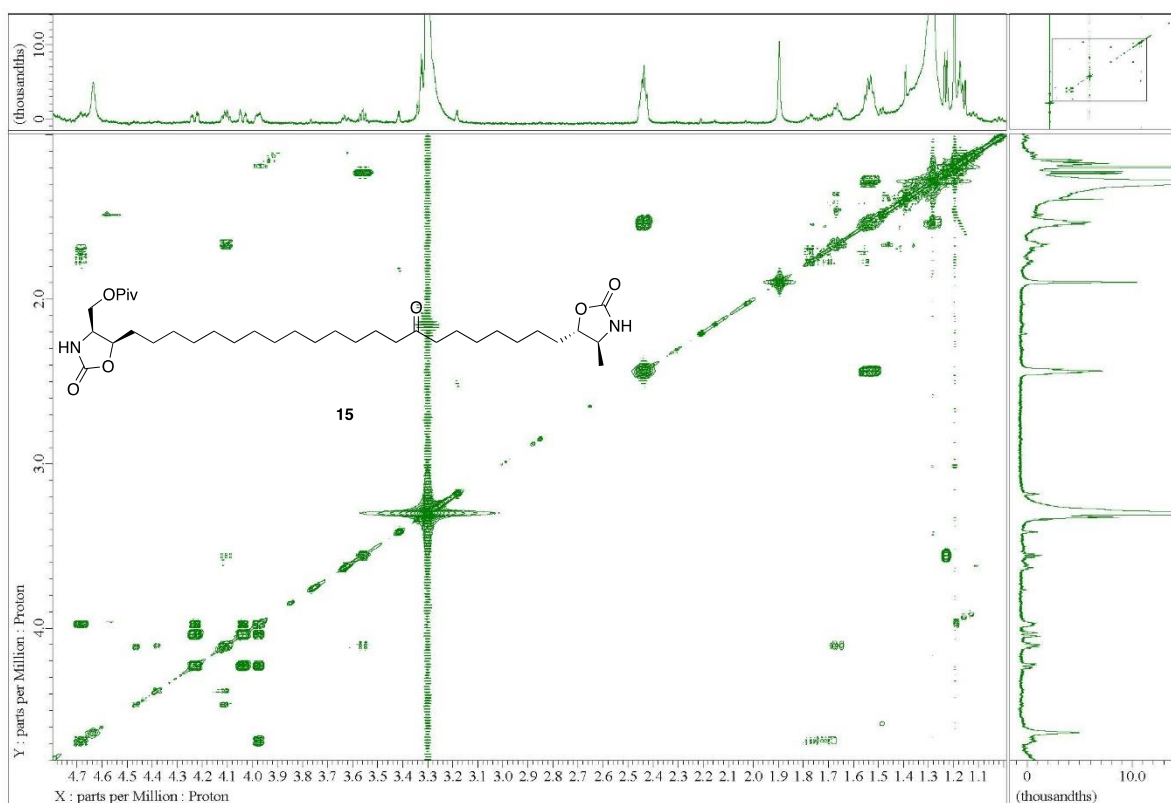

**Figure S22.** COSY spectrum (600 MHz) of the bis-oxazolidinone (15) in CD<sub>3</sub>OD

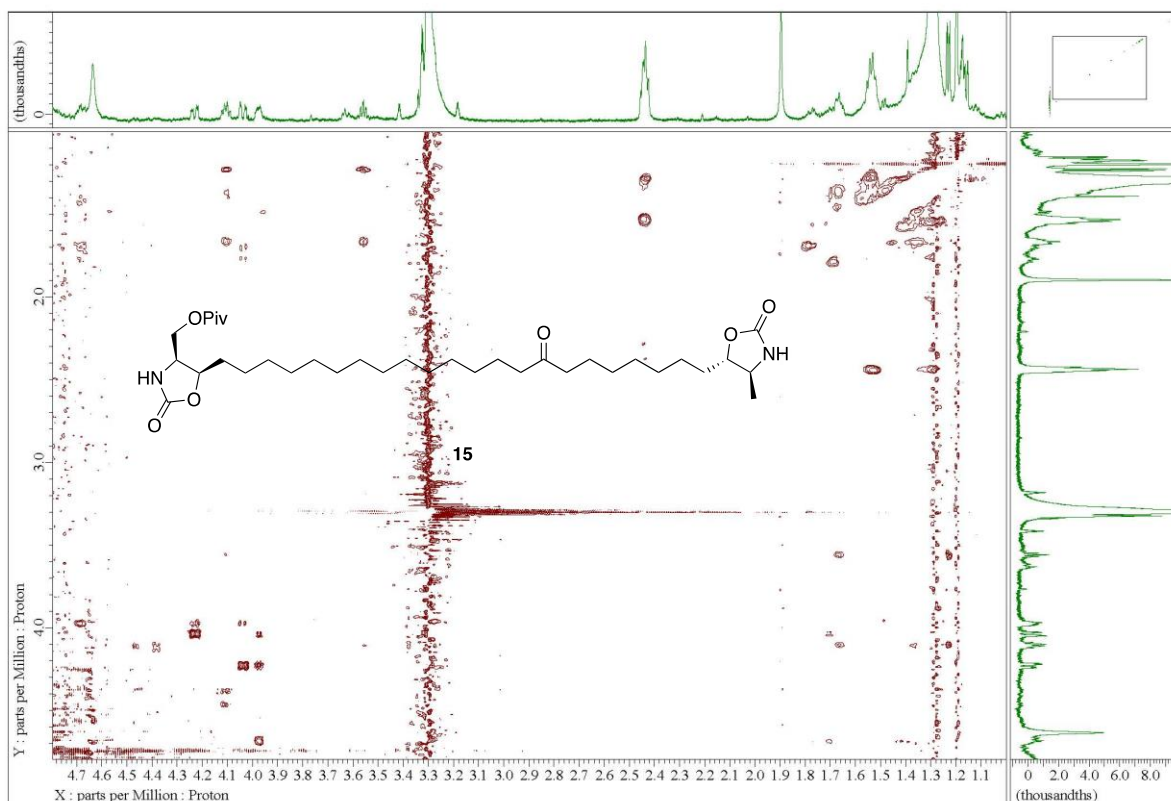

**Figure S23.** NOESY spectrum (600 MHz) of the bis-oxazolidinone (15) in CD<sub>3</sub>OD

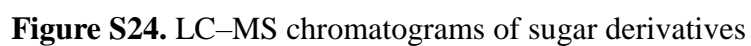

**Graph#1**

y axis

x axis

1

OCC(O)C(=O)NCCCCCCCCCCCNC(=O)CCCCCO

1

$y = ((A - D)/(1 + (x/C)^B)) + D$

|                                        | A     | B      | C      | D     | R <sup>2</sup> |
|----------------------------------------|-------|--------|--------|-------|----------------|
| ○ Plot#1 (Group#1: Dilution vs Values) | 1.164 | 19.057 | 31.035 | 0.161 | 0.949          |

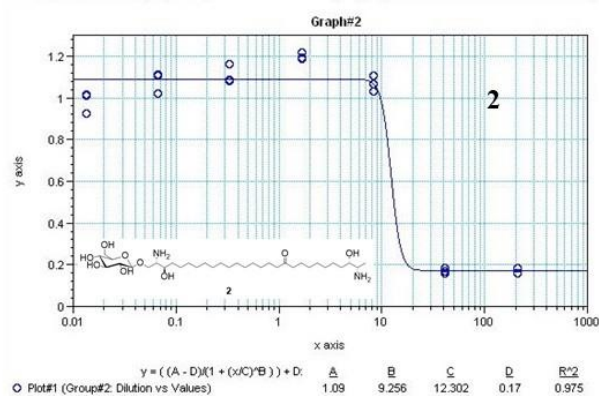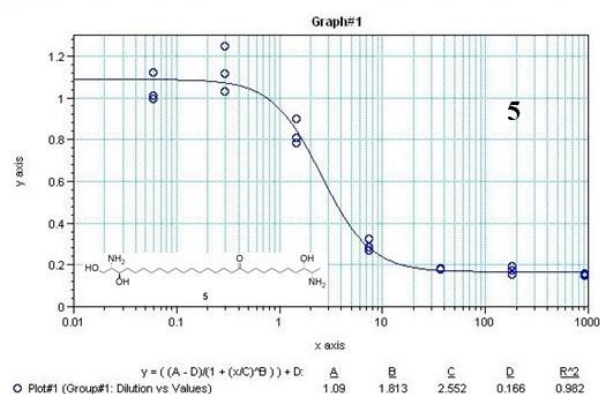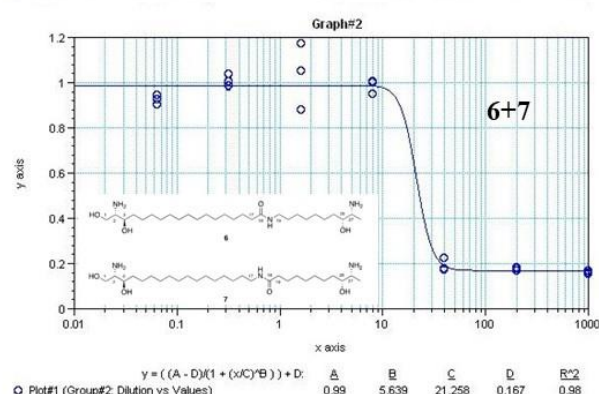

**Figure S25.** Graphs of MTT assay of **1**, **2**, **5** and the mixture of **6** and **7** against HeLa cells
